# Supplementary material for: Shifts in soil microbiome surrounding a thermal treatment facility for hazardous waste: the hidden impact of environmentally persistent free radicals
Source: Royal Society of Chemistry journal article supplement (doi:10.1039/d5em00439j), 2026-04-27
Supplement: d5em00439j1.pdf [file d5em00439j1.pdf]

## 1 Supplemental figures

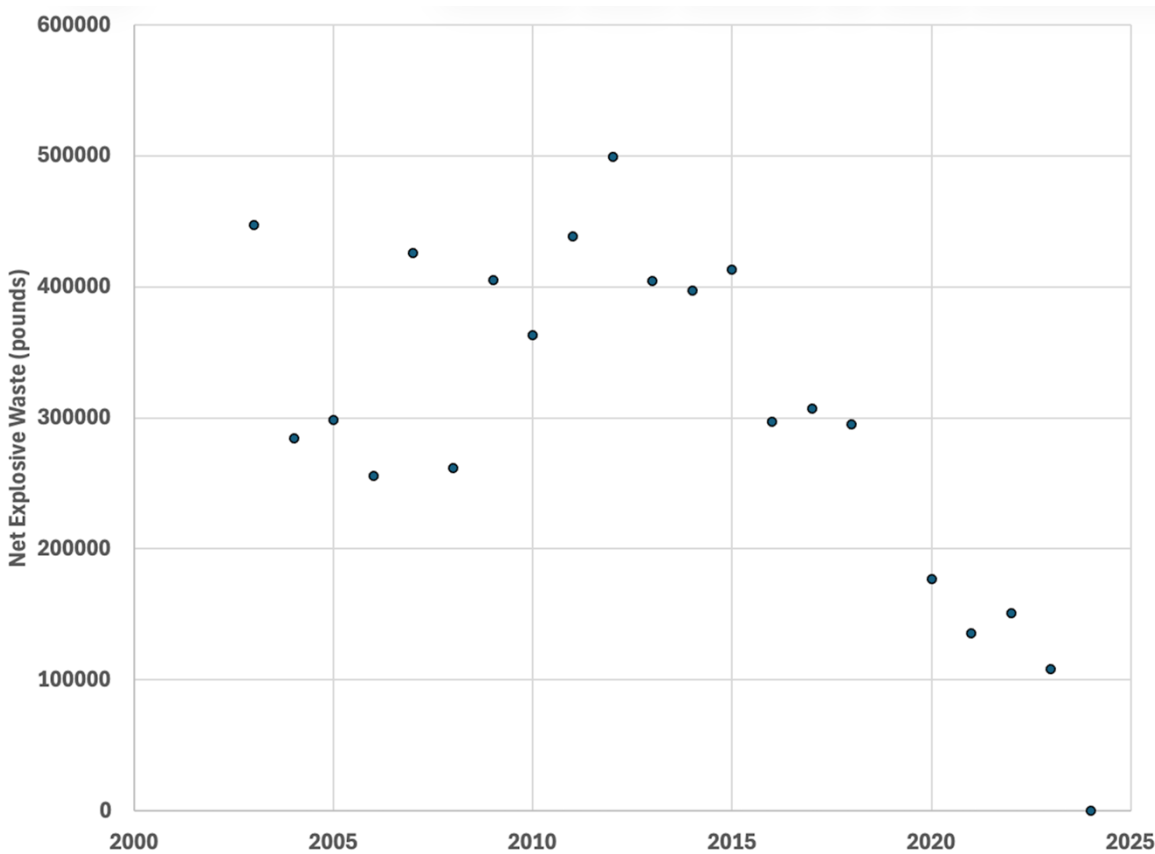

3 **Figure S1.** Annual net explosive waste treated at the thermal treatment facility from 2003–2024  
4 based on publicly available air emissions reports retrieved from the Louisiana Department of  
5 Environmental Quality (LDEQ) Electronic Document Management System (EDMS). The data  
6 represent annual totals reported in facility air emissions reports and reflect the net quantity of  
7 explosive waste treated through thermal operations each year.

8

9 **Figure S2.** Annual average and seasonal average wind roses from the NOAA Weather Station  
10 (722487-13935) at the Alexandria International Airport, Alexandria, LA. Data were obtained for  
11 the time period between January 1, 2000 and December 31, 2023.

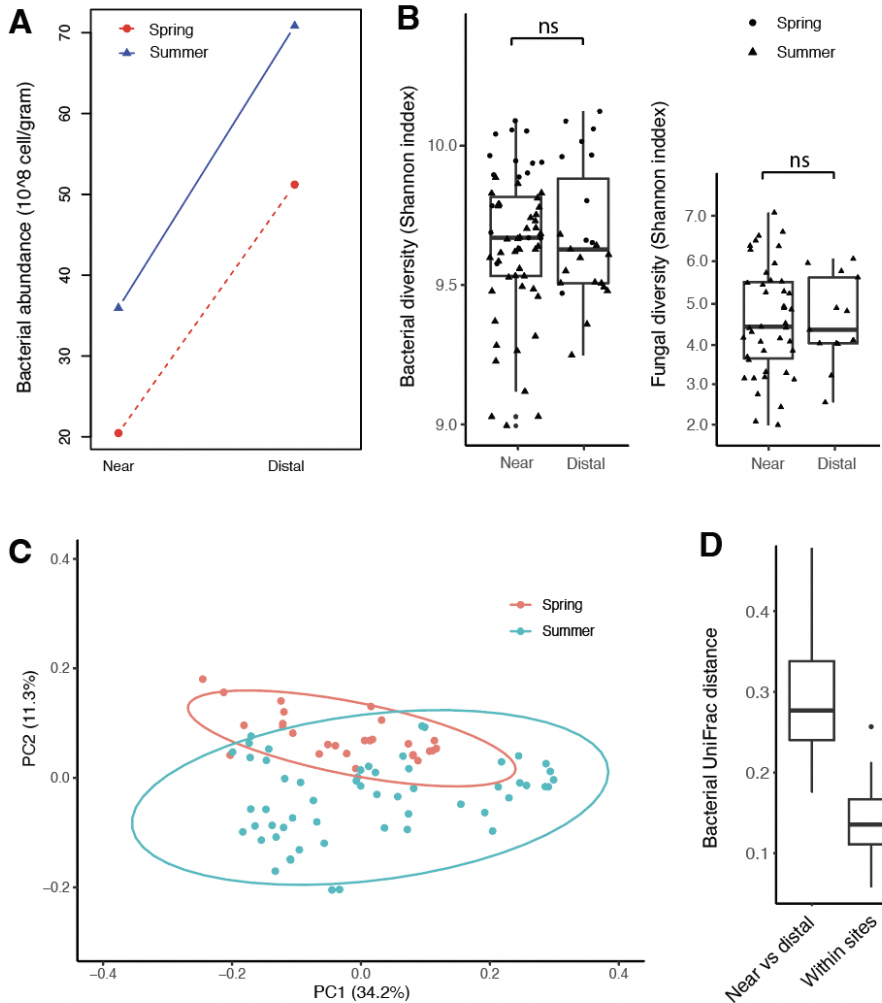

12

13 **Figure S3 A.** Interaction plot of bacterial abundance near and distal to the facility between  
 14 spring and summer. **B.** Bacterial and fungal diversity are similar between near and distal sites  
 15 as assessed by Shannon alpha diversity indices. **C.** Principal coordinate analysis based on  
 16 weighted UniFrac distance shows separated clustering bacterial composition in spring and  
 17 summer samples along the PC2 axis. **D.** Box-whisker plots of the weighted UniFrac distances  
 18 exhibit greater difference in bacterial composition between near and distal sites compared to  
 19 within sites.

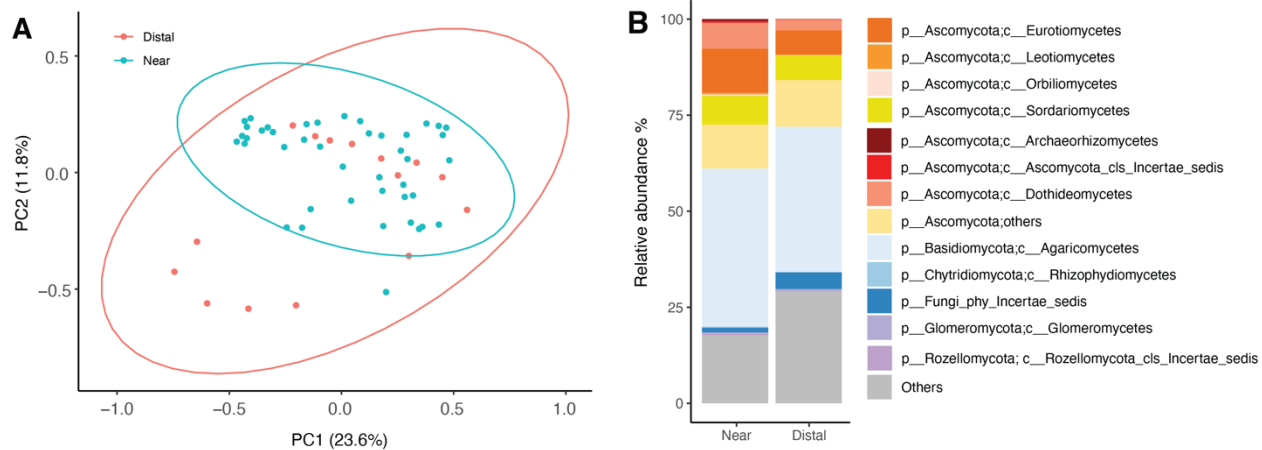

20

21 **Figure S4 A.** Principal coordinate analysis shows similar fungal composition in near and distal  
 22 sites. **B.** Fungal composition in near and distal sites. Relative fungal abundance was presented  
 23 here as the mean of samples.

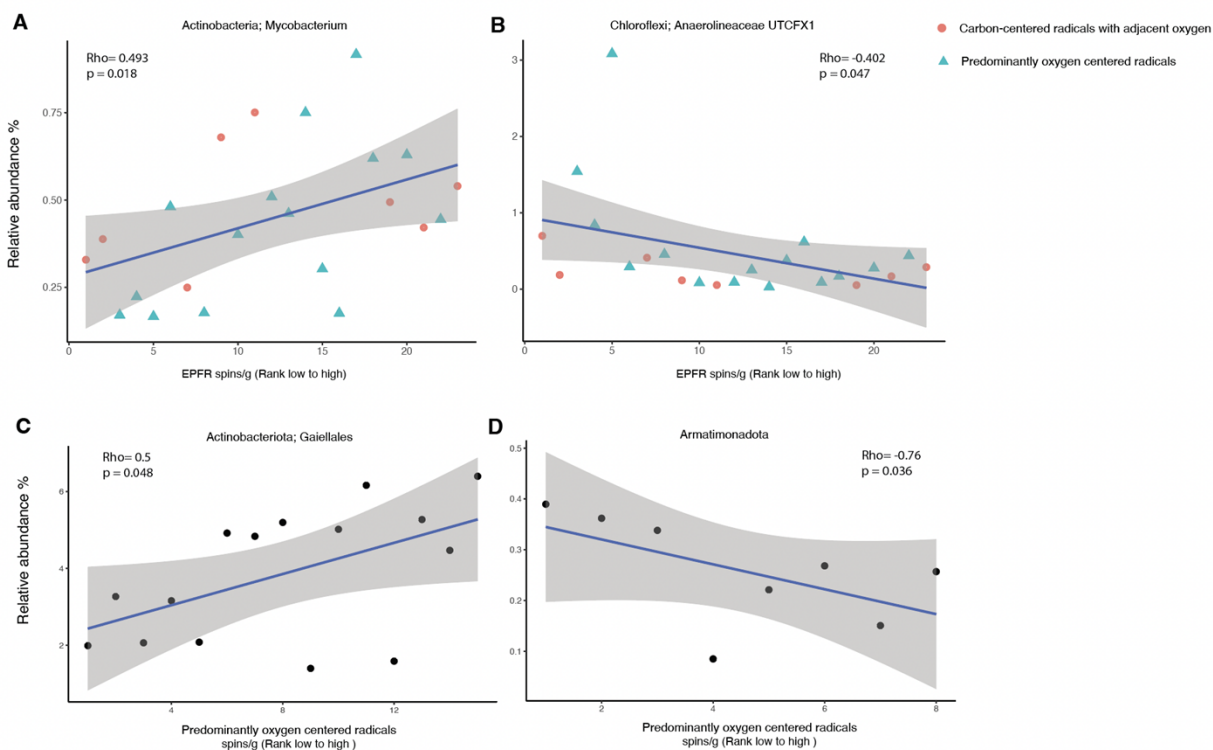

24

25 **Figure S5 A-B.** Spearman correlations between the relative abundance of *Mycobacterium*  
 26 (*Actinobacteria*), and *Anaerolineaceae* (*Chloroflexi*) with EPFR abundance: carbon-centered

27 radicals with adjacent oxygen (red circles) and predominantly oxygen-centered radicals (green  
28 triangles). **C-D**. Spearman correlations between the relative abundance of *Gaiellales*  
29 (*Actinobacteria*), and an uncultured *Armatimonadota* species with EPFR abundance for  
30 predominantly oxygen-centered radicals. Grey shading indicates the 95% confidence interval  
31 around the estimated mean, calculated using `geom_smooth()` in `ggplot2` with a linear model  
32 (`method = "lm"`)

33

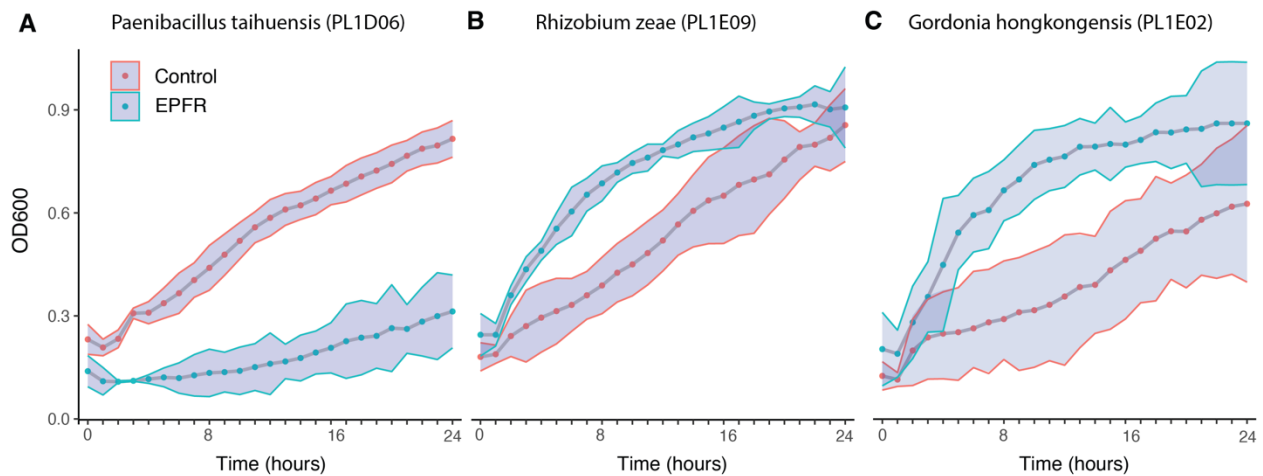

34

35 **Figure S6** Growth curves of bacterial strains *P. taihuensis* PL1D06 (**A**), *R. zeae* PL1E09 (**B**),  
36 and *G. hongkongensis* PL1E02 (**C**) with (green dots) or without laboratory-generated EPFR (red  
37 dots). Bold lines plot the mean of OD600, and bands indicate the predicted 95% confidence  
38 interval based on biological replicates.

39
